# Supplementary material for: A consistent regional dataset of dissolved oxygen in the Western Mediterranean Sea (2004–2023): O2WMED
Source: Copernicus journal article supplement (doi:10.5194/essd-2024-365), 2024-09-20
Supplement: Supplementary file 1 [file essd-2024-365-supplement.pdf]

## Supplementary material

**Table S1.** Average and standard deviation (std) of the difference between CTD oxygen sensor after calibration with Winkler measurements.

| Cruise ID | mean difference | std   | Observations |
|-----------|-----------------|-------|--------------|
| 2         | -0.15           | 0.15  | 197          |
| 3         | -0.67           | 1.44  | 140          |
| 5         | 0.21            | 0.13  | 65           |
| 6         | -0.01           | 0.04  | 70           |
| 8         | 0.11            | 0.81  | 40           |
| 9         | 0.38            | 0.14  | 90           |
| 10        | 0.14            | 0.19  | 215          |
| 11        | 0.48            | 0.50  | 129          |
| 12        | -0.03           | 0.05  | 74           |
| 13        | 0.22            | 0.09  | 86           |
| 14        | -0.03           | 0.08  | 163          |
| 15        | -0.024          | 0.23  | 216          |
| 16        | -0.04           | 0.27  | 76           |
| 17        | -0.03           | 0.25  | 94           |
| 18        | -0.04           | 0.12  | 101          |
| 20        | -0.02           | 0.52  | 120          |
| 21        | -0.004          | 0.39  | 119          |
| 211       | 0.20            | 0.20  | 215          |
| 22        | -0.004          | 0.35  | 187          |
| 222       | 0.09            | 0.27  | 126          |
| 23        | 0.06            | 0.18  | 535          |
| 24        | 0.17            | 0.65  | 224          |
| 25        | 0.14            | 0.08  | 42           |
| 27        | -0.14           | 0.11  | 15           |
| 28        | 0.06            | -0.01 | 26           |

**Table S1.** Geographical limits of subregions adapted from Manca et al. (2004).

| ID | COD              | REGION           | Lat (min) | Lat (max) | Lon (min) | Lon (max) |
|----|------------------|------------------|-----------|-----------|-----------|-----------|
| 1  | DF2              | Gulf of Lion     | 41.9      | 43.36     | 1         | 6.18      |
| 2  | DF3 <sup>1</sup> | Ligurian Sea     | 41        | 45        | 6.18      | 11        |
| 3  | DS2              | Balearic Sea     | 43.48     | 41.9      | -1        | 4.3       |
| 4  | DF1              | Algero-Provençal | 44.48     | 41.5      | 4.3       | 9.18      |
| 5  | DS1              | Alboran Sea      | 45.48     | 37.3      | -6        | -0.9      |
| 6  | DS3 <sup>2</sup> | Algerian Basin   | 46.48     | 39.18     | -1        | 8.24      |
| 7  | DT1              | Tyrrhenian North | 48.48     | 42.48     | 9.18      | 13.48     |
| 8  | DT3              | Tyrrhenian South | 49.48     | 39.18     | 10        | 16.16     |
| 9  | DI1              | Sardinia Channel | 50.48     | 39.18     | 8.24      | 10        |
| 10 | DI3              | Sicily Channel   | 51.48     | 38        | 10        | 15        |

<sup>1</sup>merged liguro-provençal and Ligurian East into Ligurian Sea.

<sup>2</sup>merged Algerian West and Algerian South into Algerian Basin
